# Supplementary material
Source: publisher figshare collection journal article supplement (https://frontiersin.figshare.com/ndownloader/files/12417290)
Supplement: Supplementary file [file 12417290]

## *Supplementary Material*

### **pH-Responsive aqueous bubbles stabilized with polymer particles carrying poly(4-vinylpyridine) colloidal stabilizer**

**Masaya Ito, Koki Takano, Haruka Hanochi, Shin-ichi Yusa, Yoshinobu Nakamura, Syuji Fujii\***

\* **Correspondence:** Prof. Syuji FUJII: [syuji.fujii@oit.ac.jp](mailto:syuji.fujii@oit.ac.jp)

#### *Gel-permeation chromatography (GPC)*

GPC measurement was carried out for P4VP homopolymer with a Jasco UV-2075 detector equipped with a Shodex OHpak SB-804 HQ column working at 40 °C with a flow rate of 0.6 mL/min. An acetic acid (0.5 M) solution containing sodium sulfate (0.3 M) was used as the eluent. Number-average molecular weight ( $M_n$ ) and molecular weight distribution ( $M_w/M_n$ ) were calibrated using standard poly(2-vinylpyridine) samples.

#### *Digital camera*

Optical photographs of the samples were taken using a digital camera (GX200, Ricoh).

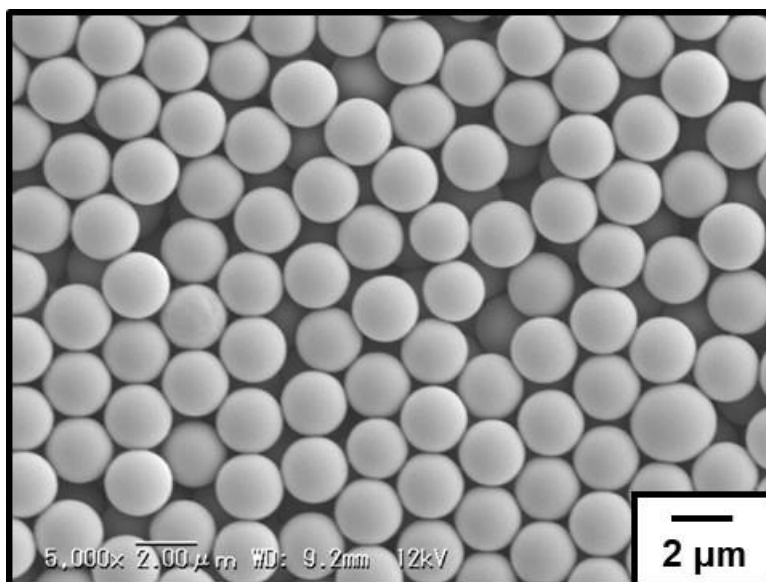

**Supplementary Figure 1.** SEM image of the P4VP-PS particles used in this study.

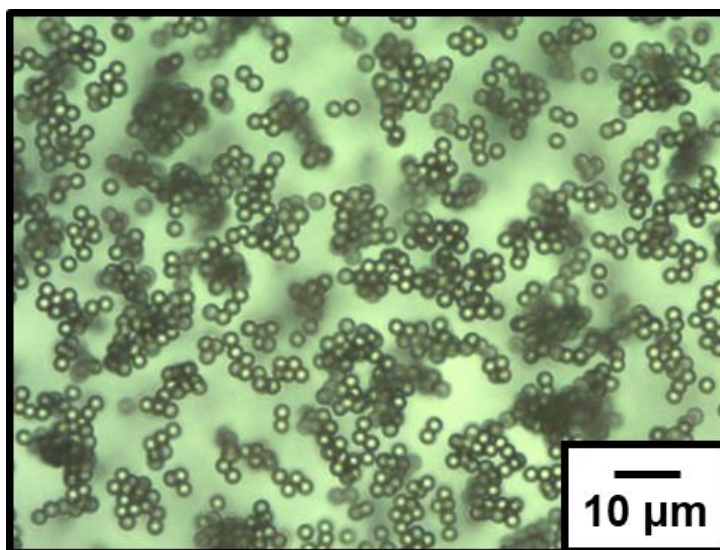

**Supplementary Figure 2.** Optical micrograph of aqueous dispersion of P4VP-PS particles observed at pH 4.0.

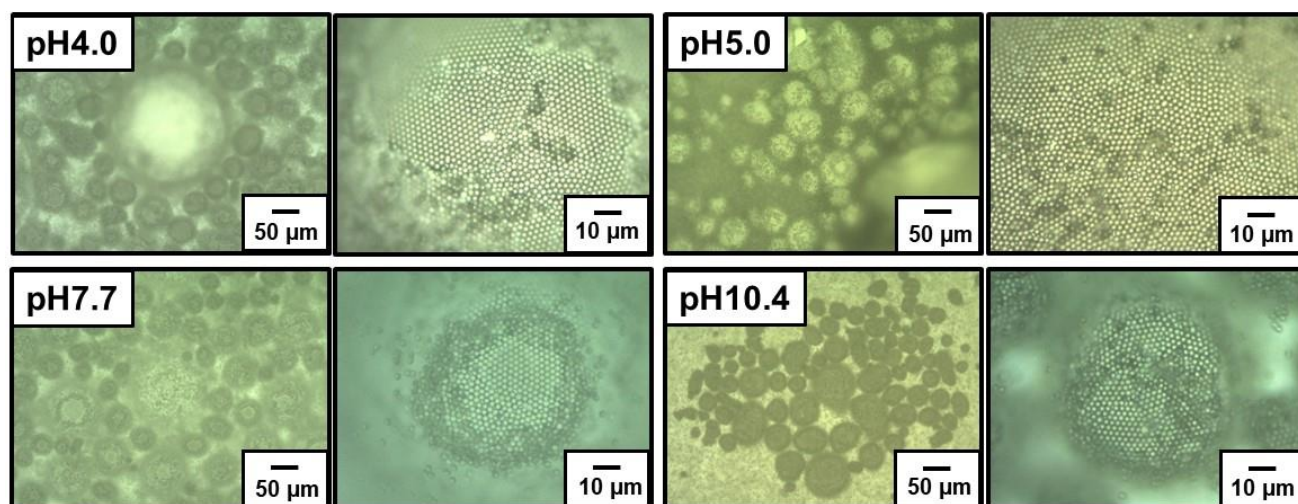

**Supplementary Figure 3.** Optical micrographs of bubbles stabilized with P4VP-PS particles at pH 4.0, 5.0, 7.7 and 10. Right side images are magnified images of left side images.

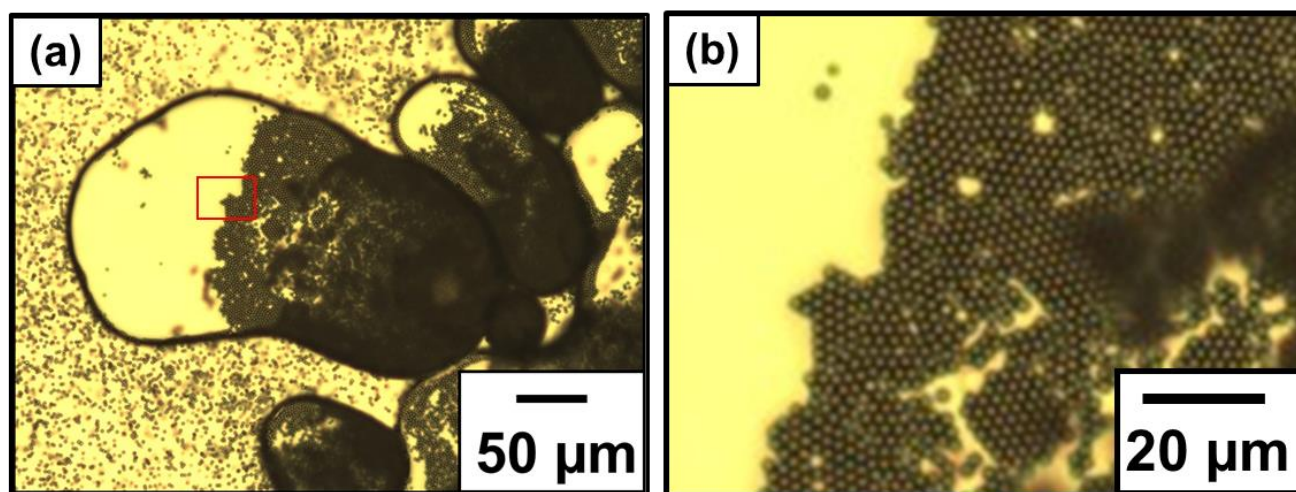

**Supplementary Figure 4.** (a) Optical micrograph of a crushed air bubble. (b) Magnified image of the area shown in (a).
